# Supplementary material for: Cooperative base pair melting by helicase and polymerase positioned one nucleotide from each other
Source: eLife journal article supplement (doi:10.7554/elife.06562), 2015-05-13
Supplement: supp [file elife-06562-supp-v1.zip]

Figure 2 – figure supplement 1

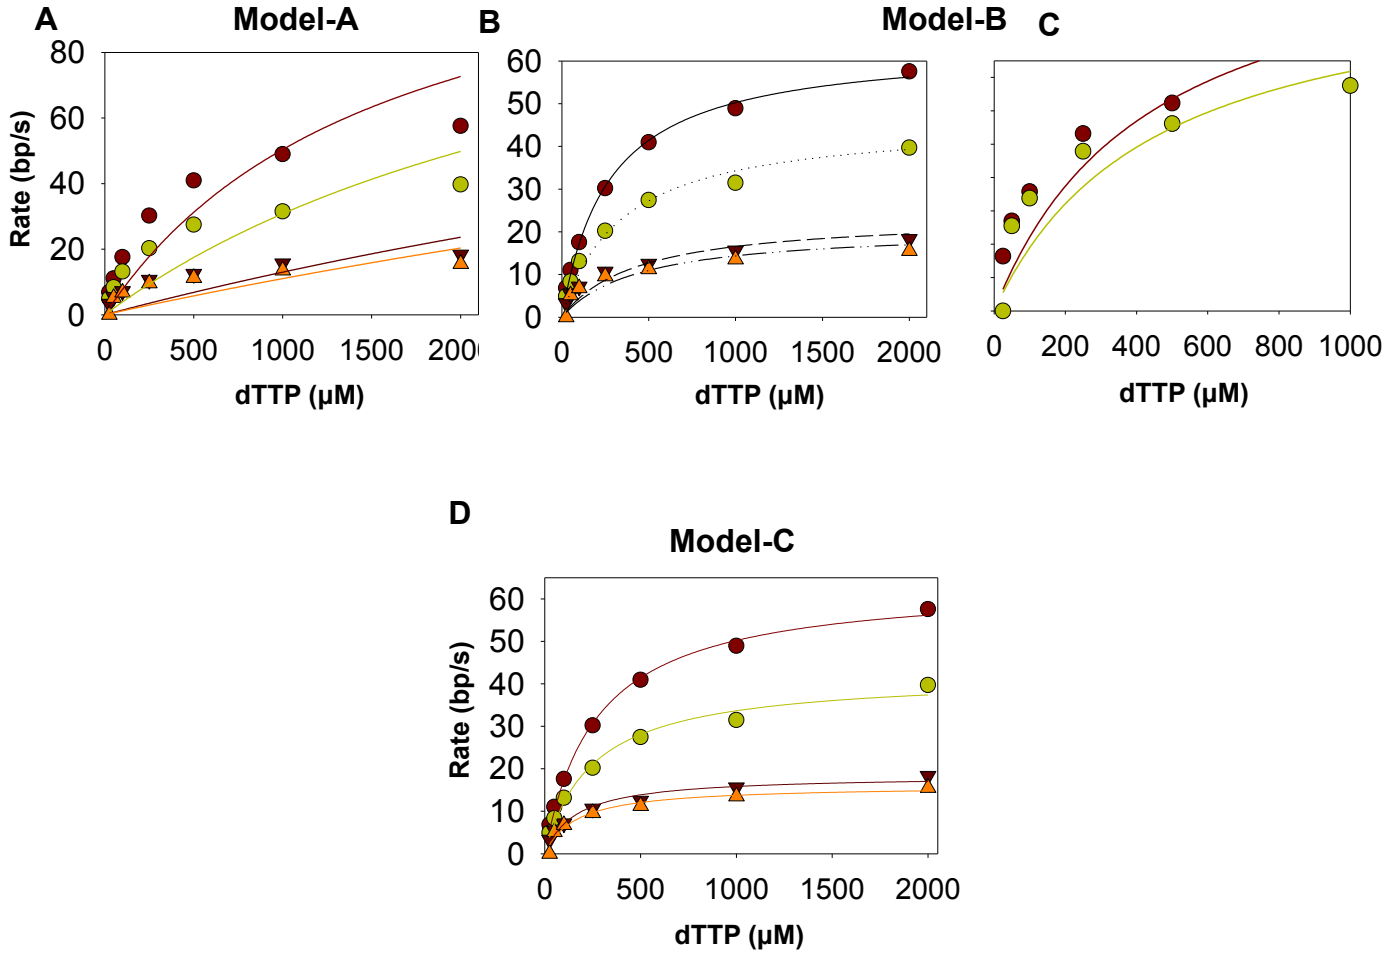

### Model - A

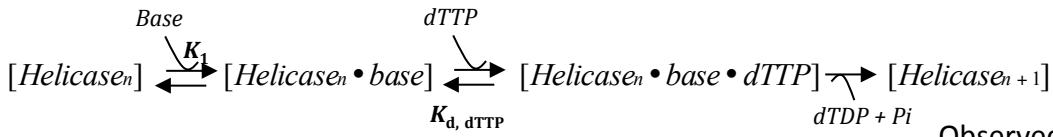

$$\begin{array}{l}
 \text{Observed } K_m = K_{d, \text{dTTP}} * (1 + 1/K_1) \\
 \text{Observed } k_{\text{cat}} = k_{\text{cat}}
 \end{array}$$

### Model - B

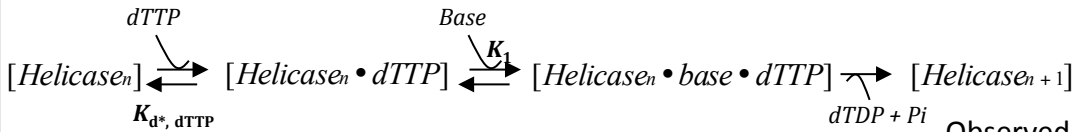

$$\begin{array}{l}
 \text{Observed } K_m = K_{d^*, \text{dTTP}} / (1 + K_2) \\
 \text{Observed } k_{\text{cat}} = k_{\text{cat}} * K_2 / (1 + K_2)
 \end{array}$$

### Model - C

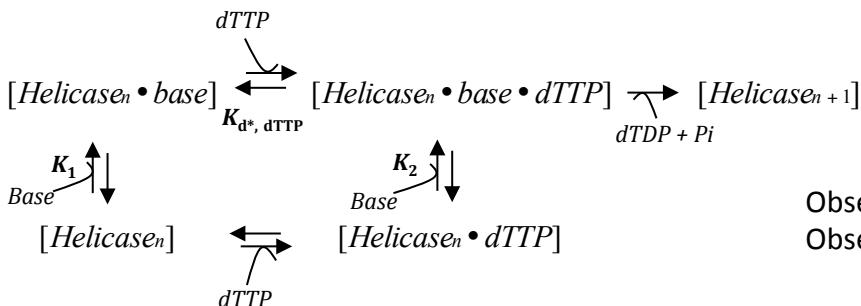

$$\begin{array}{l}
 \text{Observed } K_m = K_{d, \text{dTTP}} * K_2 (1 + K_1) / K_1 (1 + K_2) \\
 \text{Observed } k_{\text{cat}} = k_{\text{cat}} * K_2 / (1 + K_2)
 \end{array}$$
