# Supplementary figures and images for: Cooperative base pair melting by helicase and polymerase positioned one nucleotide from each other
Source: eLife journal article supplement (doi:10.7554/elife.06562), 2015-05-13

Figure 5 – figure supplement 1

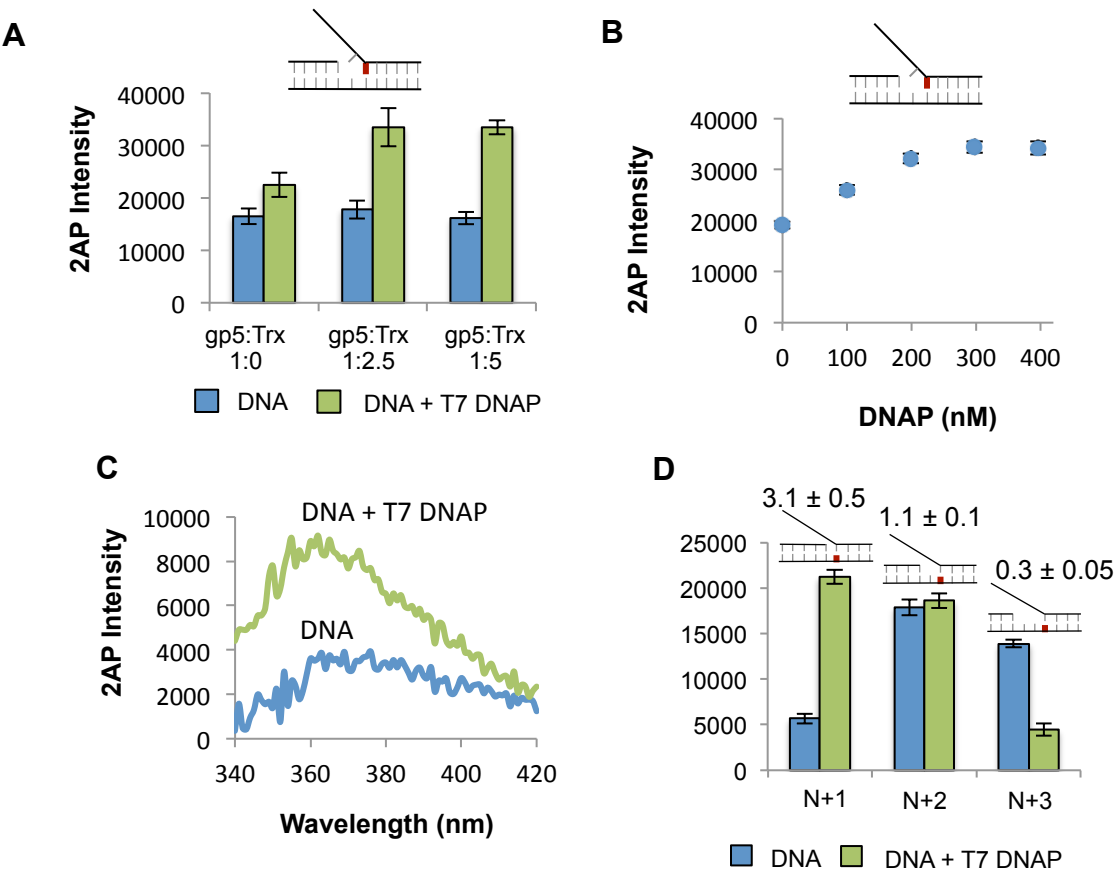

Supplement: supp [file elife-06562-supp-v1.zip]

Figure 1 – figure supplement 1

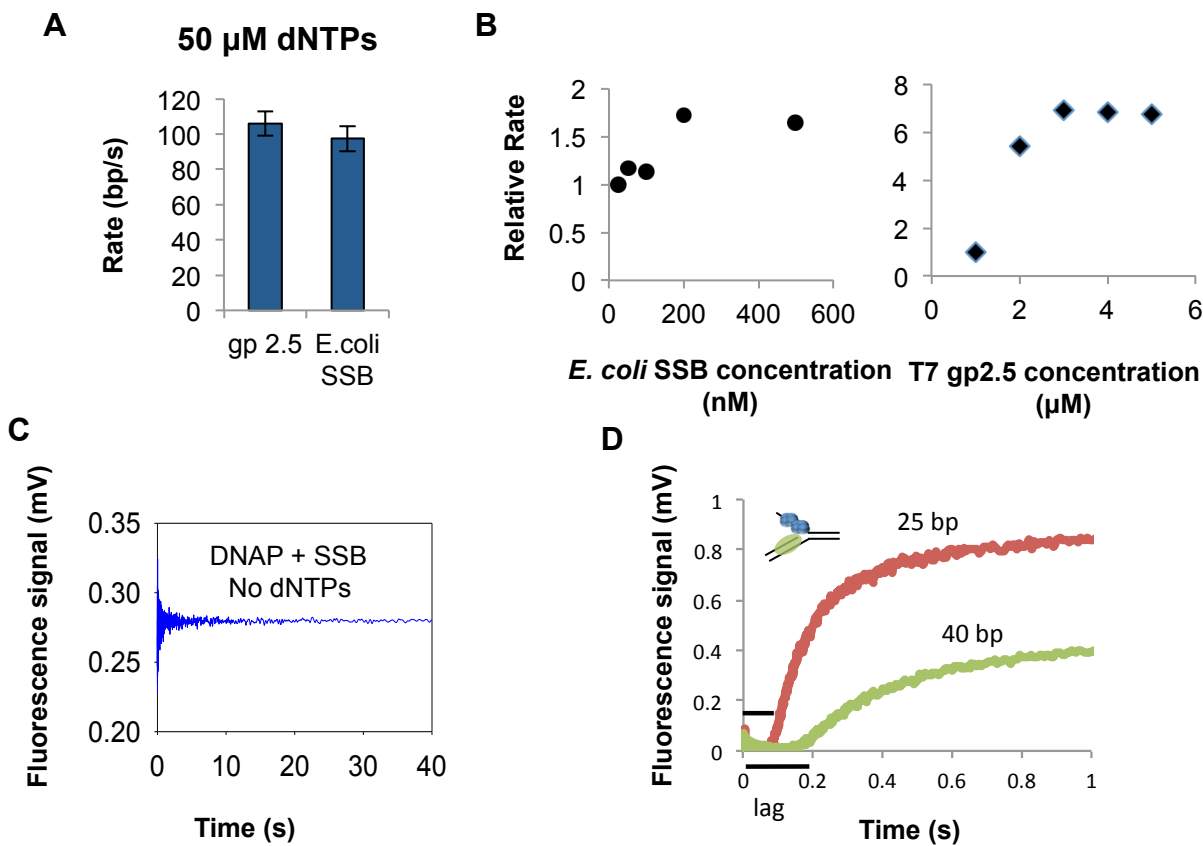

Supplement: supp [file elife-06562-supp-v1.zip]

Figure 2 – figure supplement 2

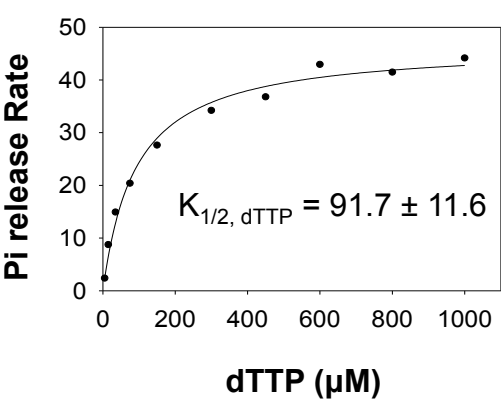

Supplement: supp [file elife-06562-supp-v1.zip]

Figure 3 – figure supplement 1

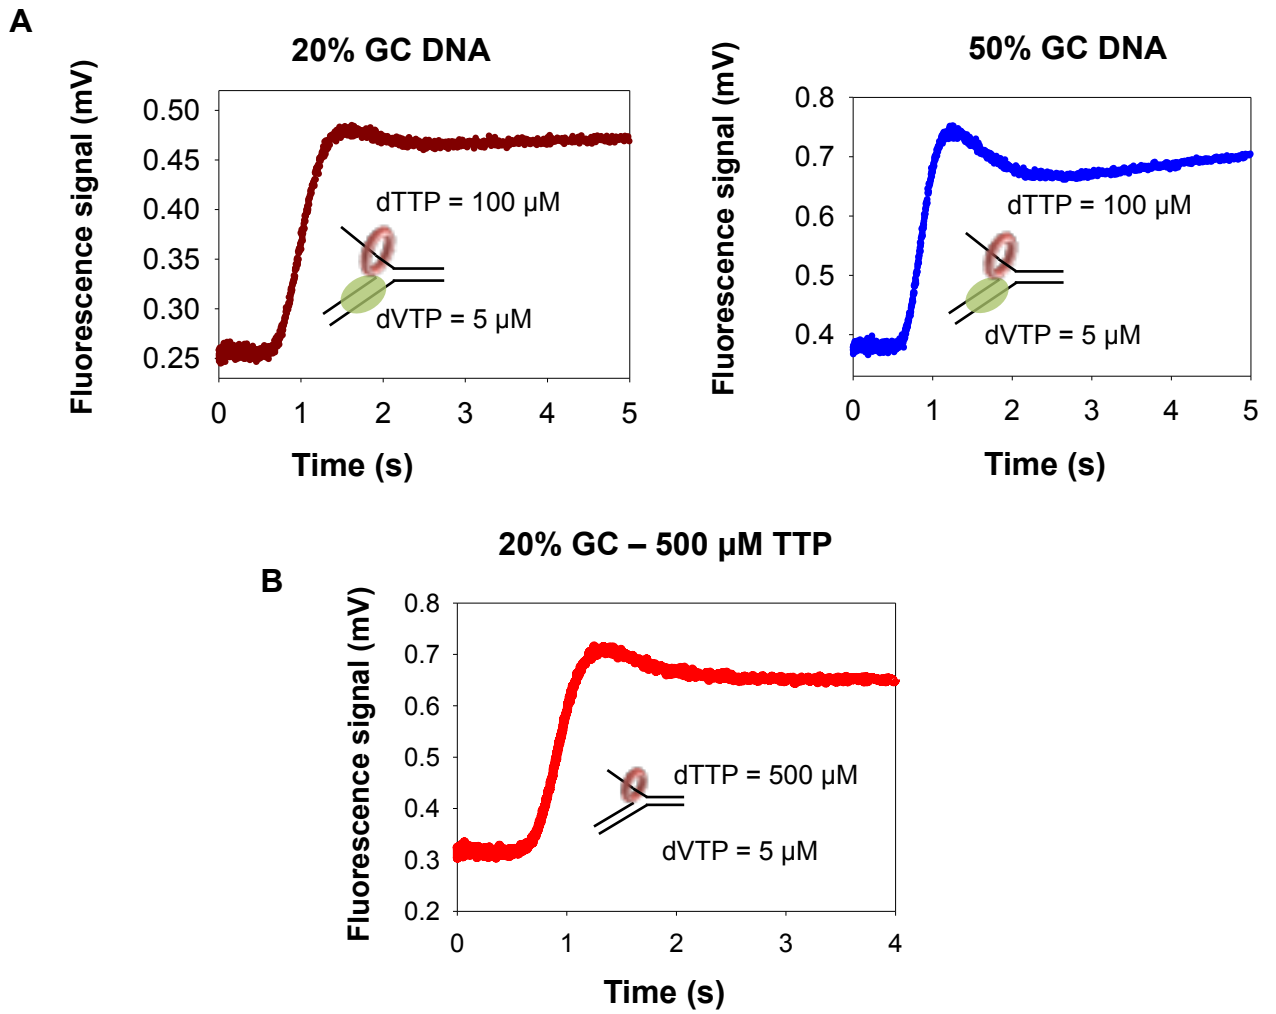

Supplement: supp [file elife-06562-supp-v1.zip]

Figure 1 – figure supplement 2

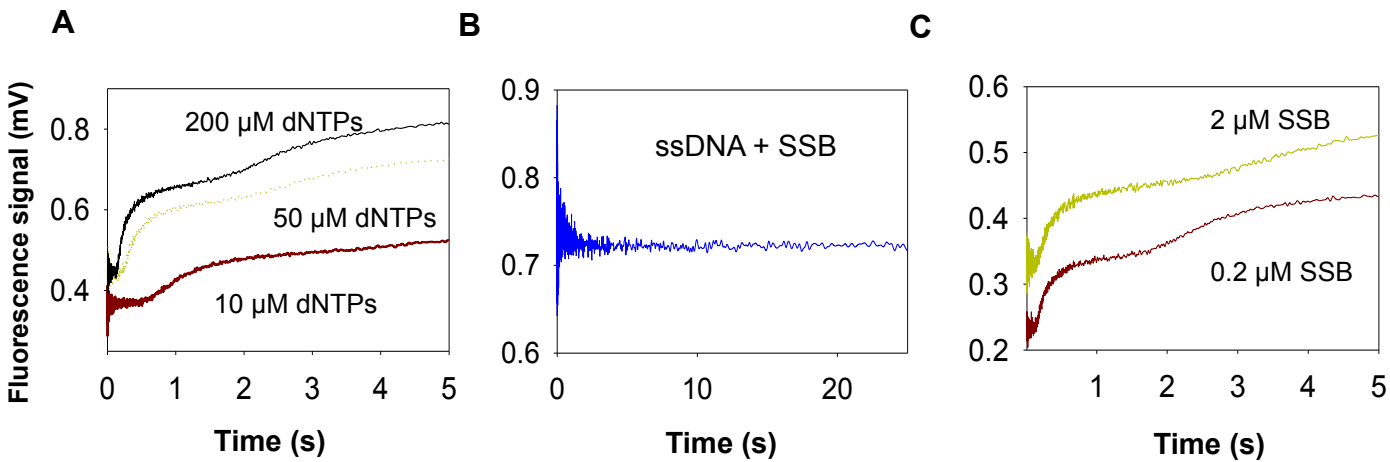

Supplement: supp [file elife-06562-supp-v1.zip]

Figure 5 – figure supplement 3

■ DNA    ■ DNA + *E. coli* SSB    ■ DNA + *E. coli* SSB + T7 DNAP

2 AP intensity at 370 nm

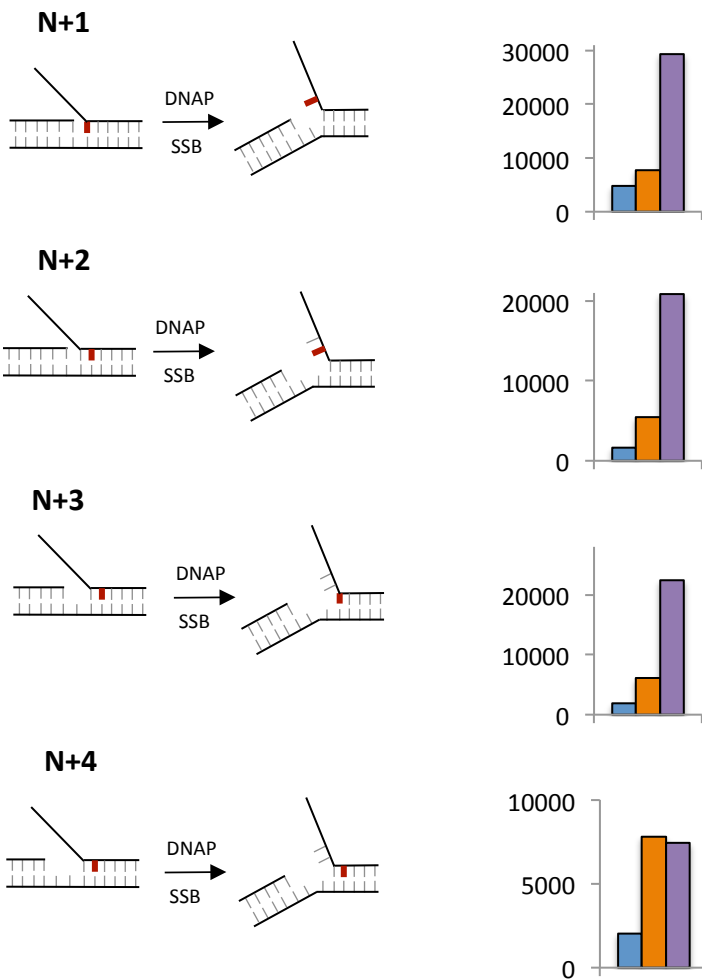

Supplement: supp [file elife-06562-supp-v1.zip]

Figure 5 – figure supplement 2

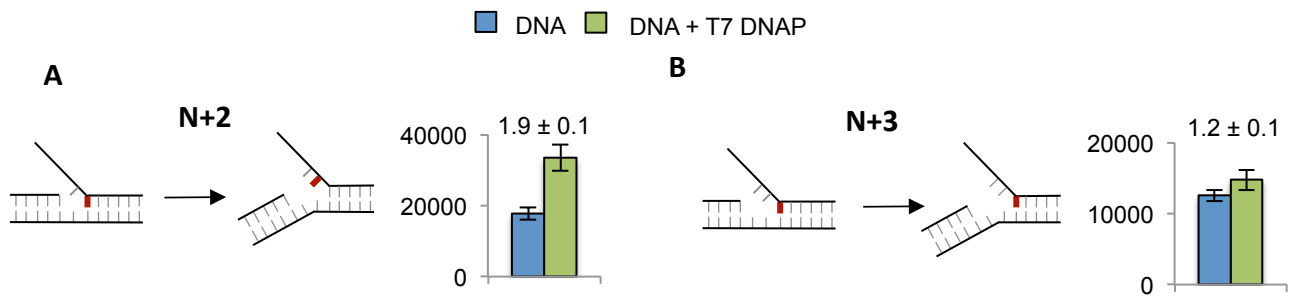

Supplement: supp [file elife-06562-supp-v1.zip]

Figure 5 – figure supplement 4

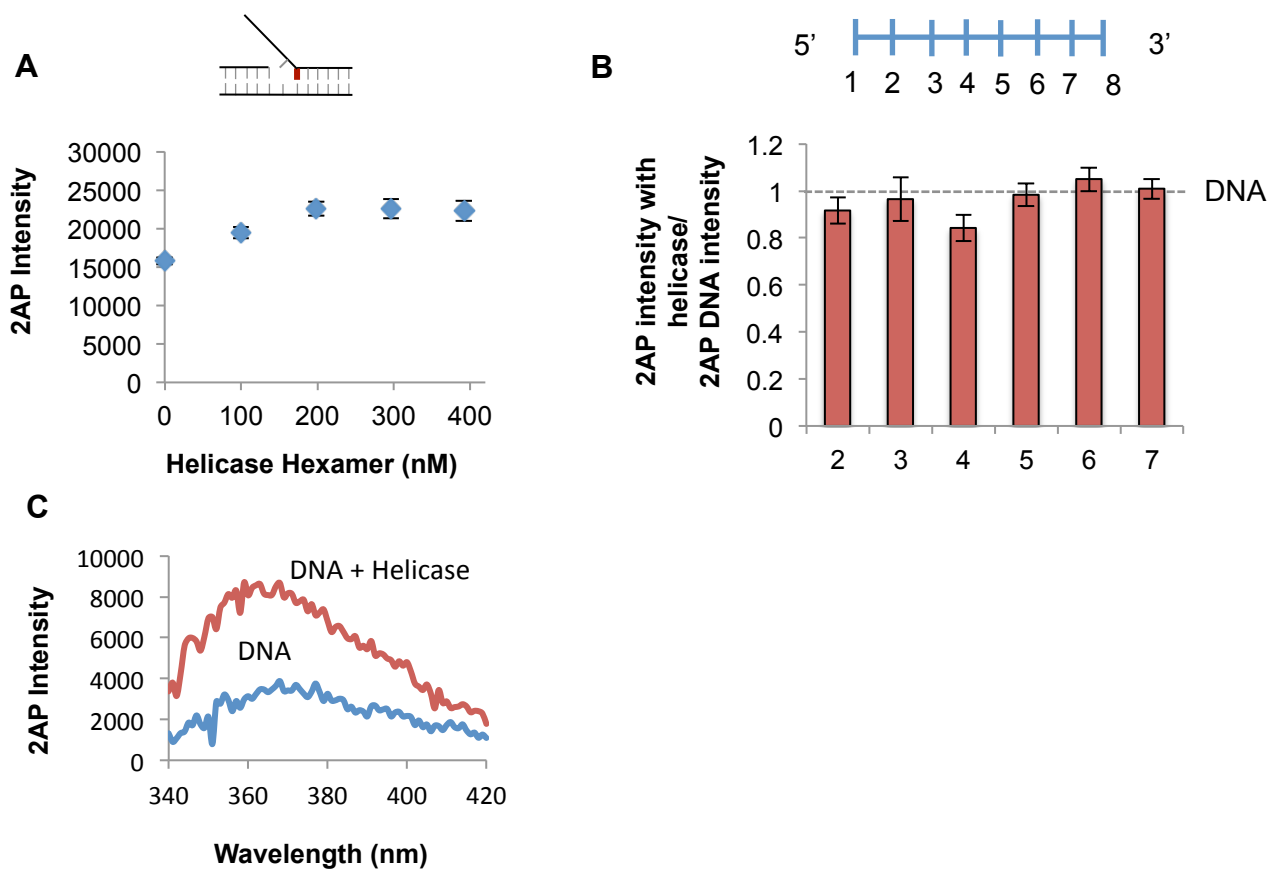

Supplement: supp [file elife-06562-supp-v1.zip]

Figure 5 – figure supplement 5

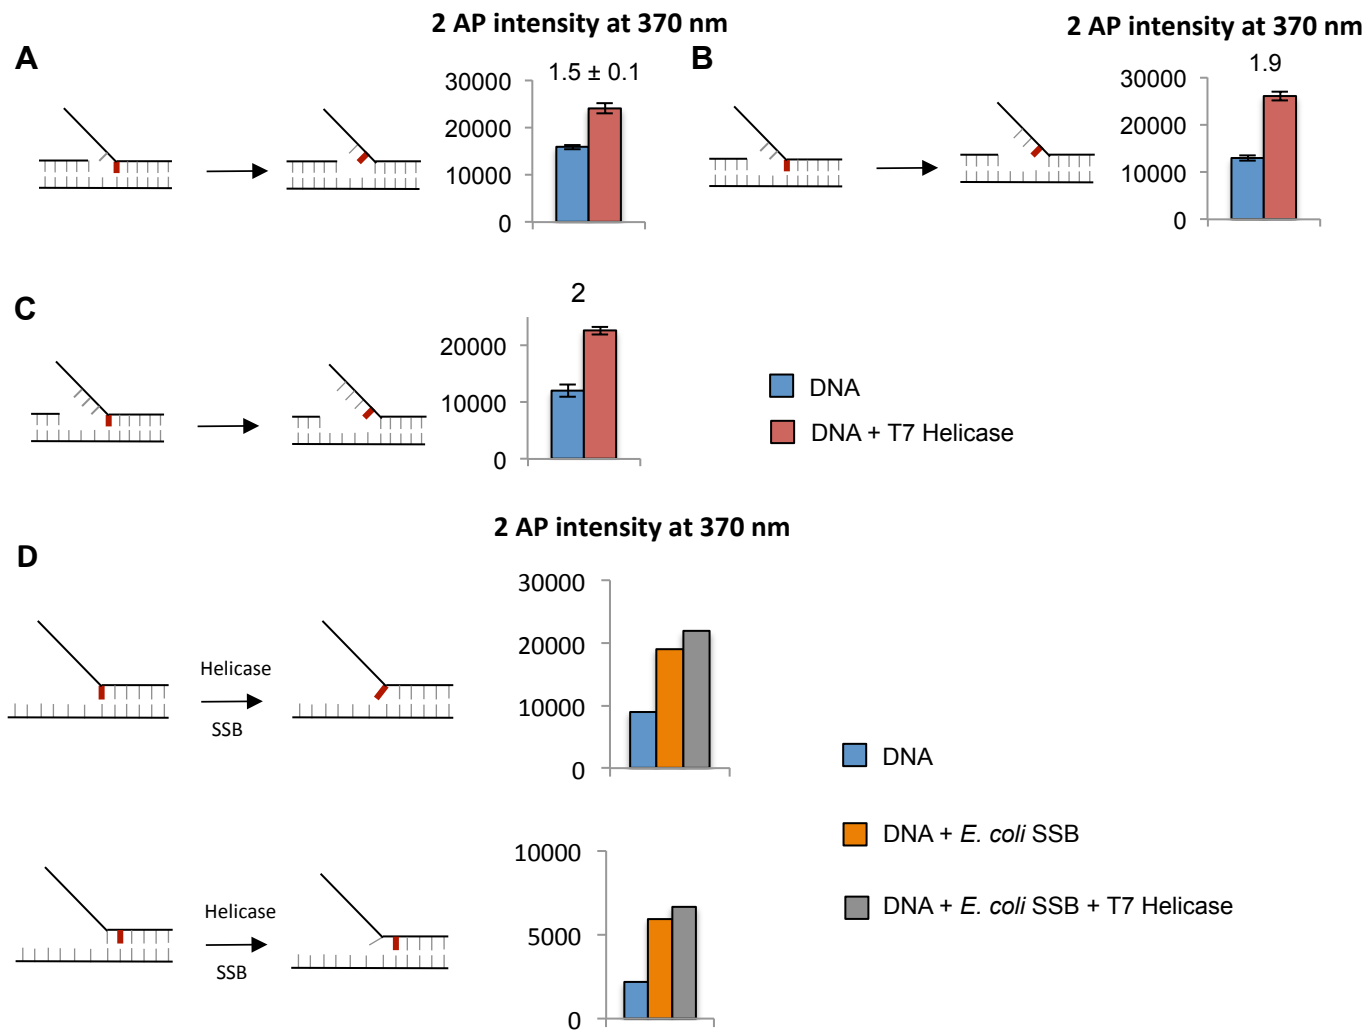

Supplement: supp [file elife-06562-supp-v1.zip]

Figure 1 – figure supplement 3

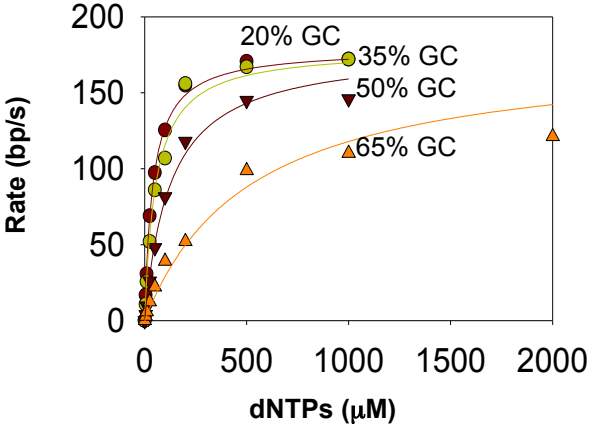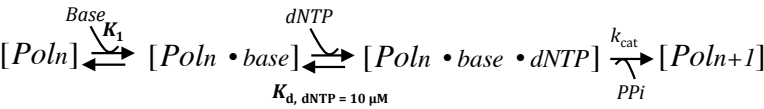

$$\text{Observed } K_m = K_{d, dNTP} * (1 + 1/K_1)$$

$$\text{Observed } k_{cat} = k_{cat}$$

Supplement: supp [file elife-06562-supp-v1.zip]
